# Supplementary material for: Myc-Induced Liver Tumors in Transgenic Zebrafish Can Regress in tp53 Null Mutation
Source: PubMed Central journal article supplement (PMC4303426; doi:10.1371/journal.pone.0117249), 2015-01-22

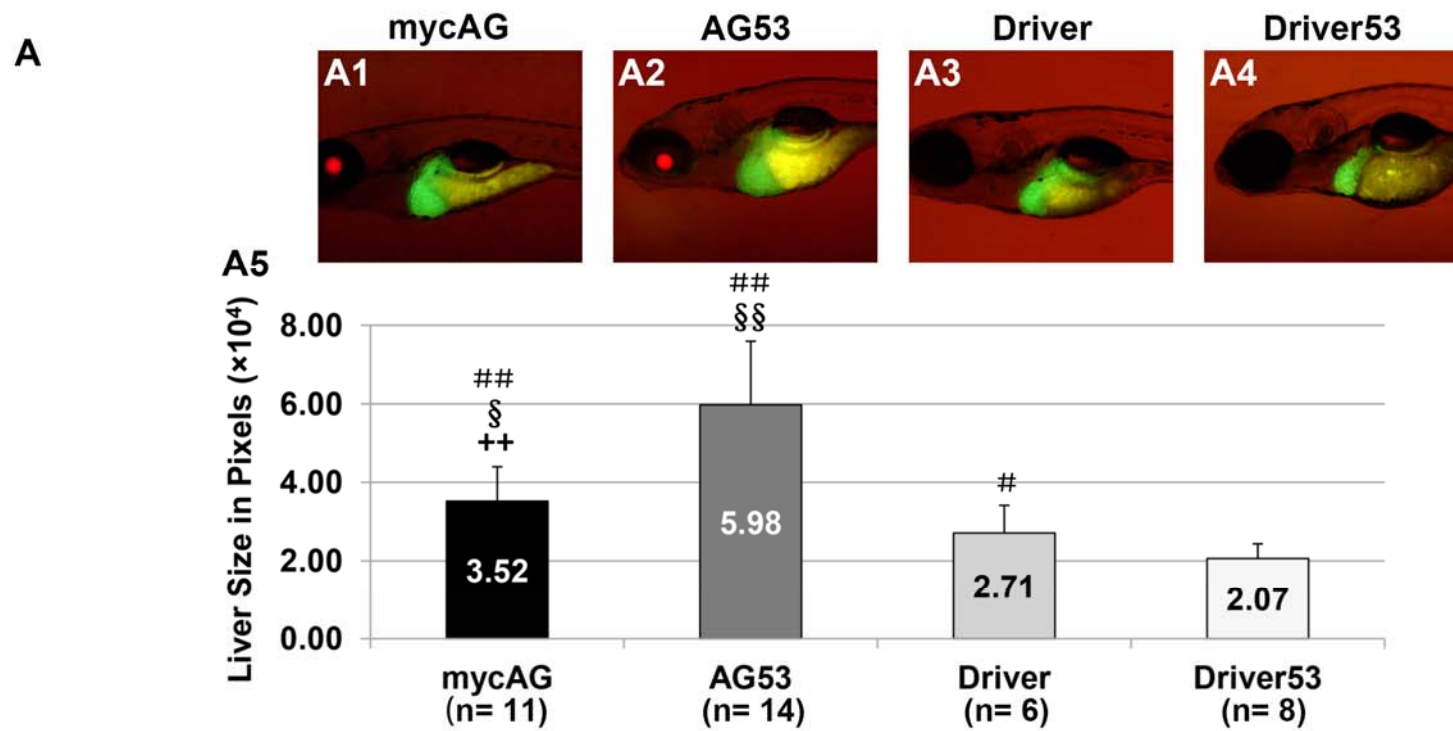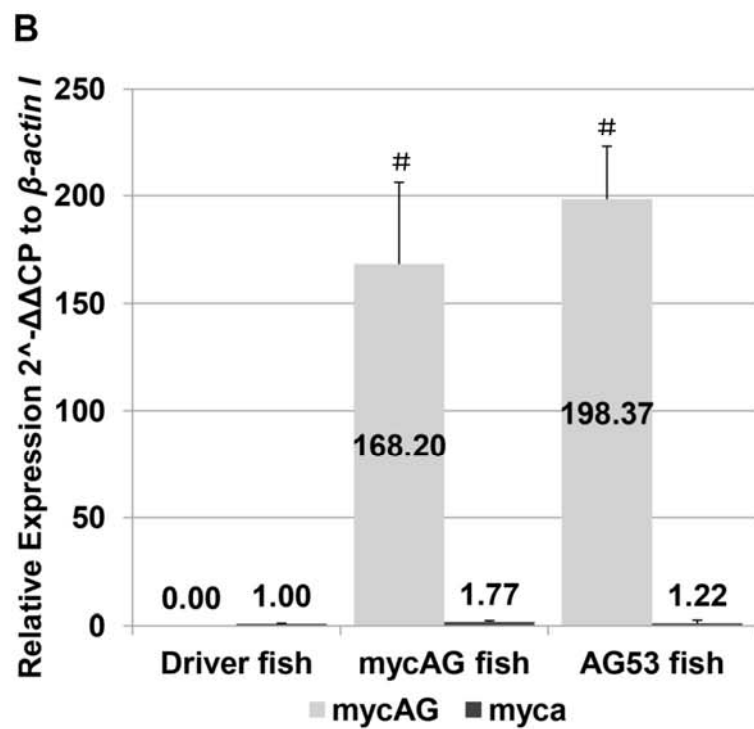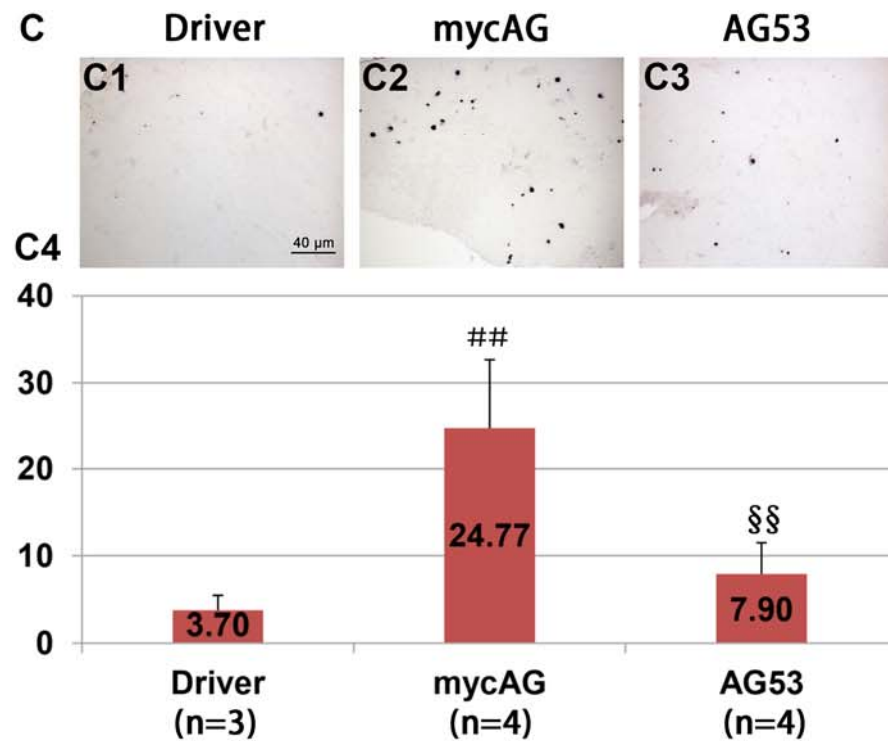

Supplement: pone.0117249.s004.pdf [file pone.0117249.s004.pdf]
